# Supplementary material for: Engaging Fathers for Effective Child Nutrition and Development in Tanzania (EFFECTS): study protocol for a five-arm, cluster-randomized trial
Source: PubMed Central journal article supplement (PMC10938806; doi:10.1186/s13063-022-07002-4), 2024-03-14
Supplement: 13063_2022_7002_MOESM2_ESM.pdf [file 13063_2022_7002_MOESM2_ESM.pdf]

3.1D | **Activity 1: Understanding and Appreciating Things that Children Can Do**

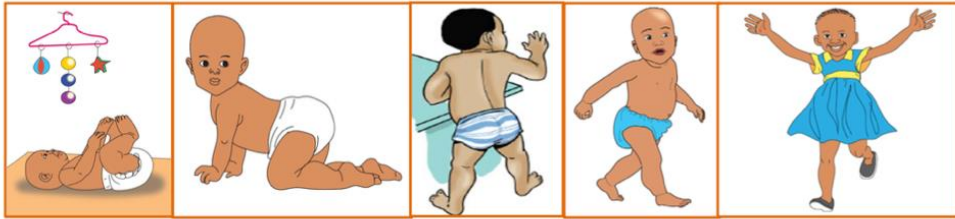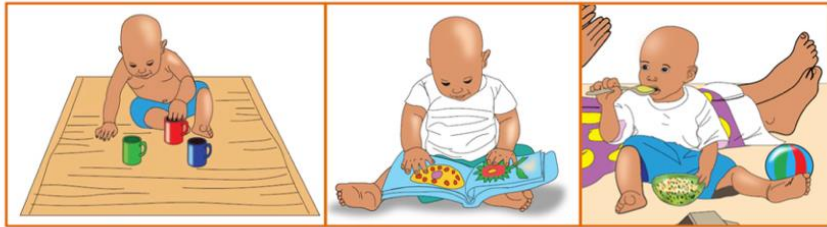

**SESSION 16.1: Playing and Communicating with Your Child to Help Them Grow Smart**

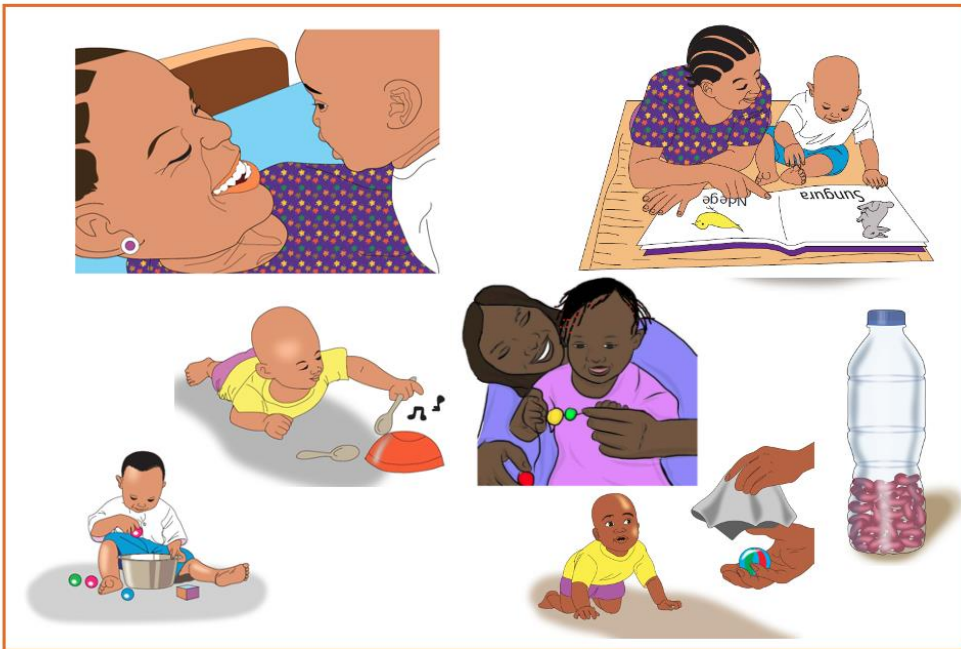

**SESSION 3.2: Fathers, Too, Can Play and Communicate with Their Children**

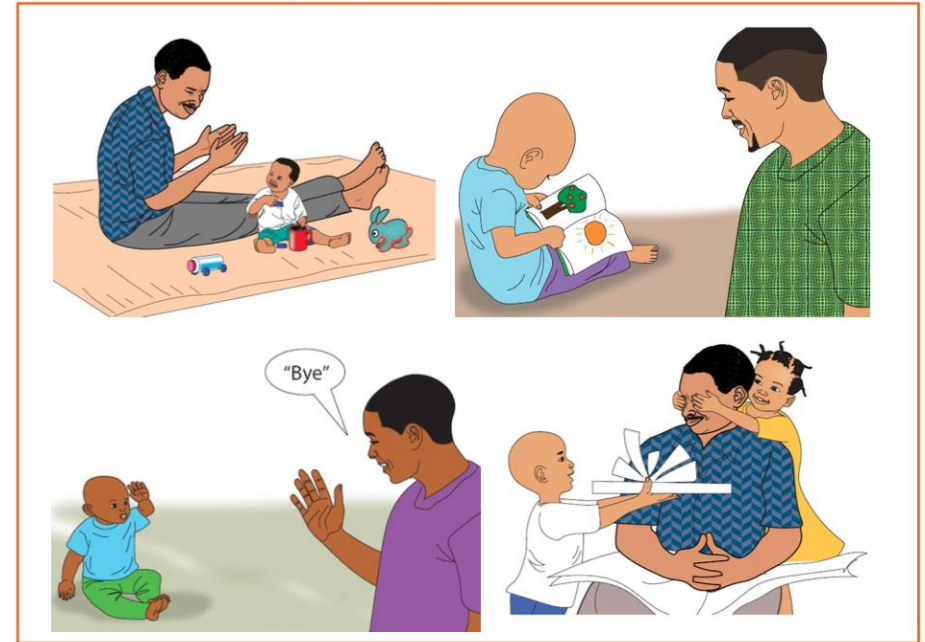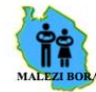

**MALEZI BORA**  
**Play and Communication Activity Guide**

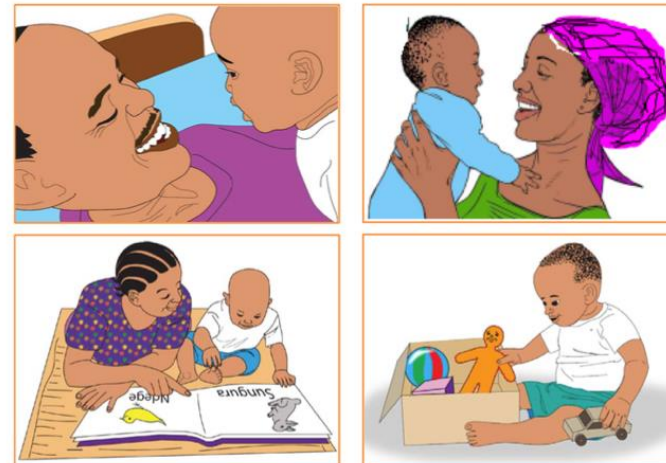

The Play and Communication Activity Guide is an adaptation of the "Care for Child Development" intervention developed by UNICEF and the WHO.
